# Supplementary material
Source: publisher figshare collection journal article supplement (https://frontiersin.figshare.com/ndownloader/files/26594207)
Supplement: Supplementary file [file 26594207]

**Supplementary Figure 8.** Translated sequences of productive IgA and IgG-encoding reads derived from NGS data sets of two subjects (donors 2 and 4) that both have IGHV7-4-1\*01 but not IGHV7-4-1\*02 in their genotype (Kirik et al., 2017b). The sequencing protocol (Levin et al., 2017) allowed for determination of the sequence from the end of framework 1 and extended into the first constant domain of the heavy chain. The sequences encoded by IGHV7-4-1\*01 and IGHV7-4-1\*02 are shown on top of the figure. Residue 92 is highlighted by an arrow.

.....
